# Supplementary material
Source: publisher site journal article supplement (https://www.dovepress.com/article/583141)
Supplement: Supplementary file 1 [file 583141%20Supplementary%20Material.docx]

**Supplementary Material**

Xiaolong Wang1 Kexin Yao1 Yue Niu1 Zheyi Dong1 Shuang Liang 1

1Department of Nephrology, First Medical Center of Chinese PLA General Hospital, Chinese PLA Institute of Nephrology, State Key Laboratory of Kidney Diseases, National Clinical Research Center for Kidney Diseases, Beijing Key Laboratory of Kidney Diseases, Beijing, China.

## Table S1. Characteristics and risk factors for relapse in patients who achieved remission

| **Variables** | **Total (N=200)** | **Relapse (N=94)** | **Non-relapse (N=106)** | **P** |
| --- | --- | --- | --- | --- |
| **Demographics** |  |  |  |  |
| Age (years) | 51.0 (37.0, 60.0) | 52.5 (43.0, 61.0) | 49.5 (37.6, 59.3) | 0.128 |
| Gender (male), n (%) | 127 (63.5%) | 64 (68.1%) | 63 (59.4%) | 0.205 |
| BMI (kg/m²) | 26.4 (24.1, 28.9) | 26.4 (24.2, 29.0) | 26.4 (24.0, 28.7) | 0.926 |
| GRS | 0 (-1.27, 0) | 0 (-0.3, 0) | -0.32 (-2.0, 0) | <0.001 |
| **Laboratory Examination** |  |  |  |  |
| Hemoglobin (g/L) | 132.2±18.1 | 133.0±18.4 | 131.4±17.9 | 0.543 |
| WBC (10⁹/L) | 6.9 (5.5, 8.5) | 7.2 (5.7, 8.7) | 6.7 (5.5, 8.2) | 0.238 |
| Platelet (10⁹/L) | 258.2±66.9 | 254.7±75.0 | 263.1±61.7 | 0.384 |
| Neutrophils (%) | 0.56±0.10 | 0.59±0.11 | 0.56±0.10 | 0.068 |
| Lymphocytes (%) | 0.34±0.10 | 0.31±0.10 | 0.32±0.10 | 0.229 |
| CRP (mg/dL) | 0.1 (0.09, 0.1) | 0.1 (0.06, 0.1) | 0.1 (0.09, 0.10) | 0.681 |
| IL-6 (pg/mL) | 2.0 (2.0, 3.8) | 2.0 (2.0, 3.3) | 2.0 (2.0, 4.4) | 0.412 |
| Total protein (g/L) | 47.2 (42.5, 53.0) | 47.6 (43.0, 53.2) | 47.0 (42.2, 52.3) | 0.413 |
| Serum albumin (g/L) | 24.7 (21.5, 28.4) | 25.5 (22.5, 28.7) | 24.4 (20.8, 28.1) | 0.208 |
| Cholesterol (mmol/L) | 6.6 (5.3, 8.5) | 6.3 (5.0, 8.6) | 6.9 (5.7, 8.1) | 0.273 |
| Triglycerides (mmol/L) | 2.1 (1.5, 3.1) | 2.0 (1.5, 3.4) | 2.1 (1.6, 3.0) | 0.819 |
| HDL cholesterol (mmol/L) | 1.2 (1.0, 1.5) | 1.2 (0.9, 1.6) | 1.1 (1.0, 1.5) | 0.515 |
| LDL cholesterol (mmol/L) | 4.4 (3.3, 5.9) | 3.8 (3.1, 5.6) | 4.7 (3.5, 6.2) | 0.039 |
| Glucose (mmol/L) | 4.8 (4.4, 5.4) | 5.0 (4.5, 5.6) | 4.7 (4.4, 5.2) | 0.051 |
| Urea nitrogen (mmol/L) | 5.0 (3.9, 6.4) | 5.2 (3.8, 6.5) | 4.9 (4.0, 6.3) | 0.853 |
| Uric acid (μmol/L) | 360.1±99.2 | 370.4±104.0 | 352.0±94.3 | 0.294 |
| Serum creatinine (μmol/L) | 75.2 (62.9, 90.1) | 75.1 (62.6, 87.1) | 75.4 (63.0, 90.3) | 0.688 |
| eGFR (mL/min/1.73m²) | 96.6 (76.0, 108.1) | 94.5 (75.8, 107.0) | 98.3 (70.6, 110.3) | 0.384 |
| Complement C3 (mg/dL) | 115.0 (101.0, 131.0) | 114.0 (94.5, 124.8) | 116.0 (102.0, 133.0) | 0.275 |
| Complement C4 (mg/dL) | 29.7 (24.5, 36.9) | 28.1 (22.8, 37.9) | 31.0 (25.1, 36.9) | 0.153 |
| Anti-PLA2R antibody (RU/mL) | 38.2 (8.1, 110.0) | 38.2 (13.7, 93.5) | 38.0 (6.2, 133.0) | 0.884 |
| 24h proteinuria (g/24h) | 5.6 (4.0, 7.5) | 5.6 (4.0, 7.6) | 5.3 (4.1, 7.6) | 0.814 |
| Urinary potassium (mmol/24h) | 40.7±18.9 | 42.7±24.8 | 39.0±12.0 | 0.499 |
| Urinary calcium (mmol/24h) | 1.6 (0.7, 2.8) | 1.3 (0.7, 2.7) | 1.7 (0.7, 2.8) | 0.842 |
| Urinary sodium (mmol/24h) | 170.3±90.0 | 160.2±82.9 | 178.4±95.3 | 0.327 |
| TyG index | 9.0 (8.7, 9.5) | 9.1 (8.7, 9.5) | 9.0 (8.7, 9.4) | 0.282 |
| TyG-BMI | 236.4 (212.7, 267.9) | 236.7 (212.9, 269.9) | 236.1 (212.5, 263.2) | 0.937 |
| SII | 457.4 (335.9, 649.2) | 455.4 (340.1, 662.3) | 460.3 (322.0, 611.4) | 0.746 |
| **Comorbidities** |  |  |  |  |
| Hypertension, n (%) | 95 (47.5%) | 49 (52.1%) | 43 (43.4%) | 0.217 |
| Diabetes, n (%) | 25 (12.5%) | 15 (16.0%) | 10 (9.4%) | 0.164 |
| Hyperlipidemia, n (%) | 36 (18.0%) | 13 (13.8%) | 23 (21.7%) | 0.148 |
| Coronary heart disease, n (%) | 9 (4.5%) | 5 (5.3%) | 4 (4.8%) | 0.599 |
| **Renal Pathology** |  |  |  |  |
| Pathological stage, n (%) |  |  |  | 0.393 |
| Stage I | 65 (32.5%) | 34 (36.2%) | 31 (29.2%) |  |
| Stage II | 105 (52.5%) | 46 (48.9%) | 59 (55.7%) |  |
| Stage III | 9 (3.8%) | 3 (3.2%) | 6 (5.7%) |  |
| Stage IV | 2 (1.0%) | 2 (2.1%) | 0 (0.0%) |  |
| Glomerulosclerosis (%) | 0 (0, 7) | 0 (0, 9.5) | 3 (0, 5.8) | 0.193 |
| Renal arteriosclerosis, n (%) | 68 (34.0%) | 30 (31.9%) | 38 (35.8%) | 0.873 |
| Tubulointerstitial injury, n (%) | 10 (5.5%) | 6 (3.8%) | 4 (6.4%) | 0.696 |
| IgG1 deposition, n (%) |  |  |  | 0.680 |
| + | 161 (80.5%) | 77 (79.2%) | 84 (81.9%) |  |
| ++ | 15 (7.5%) | 5 (5.3%) | 10 (9.4%) |  |
| IgG4 deposition, n (%) |  |  |  | 0.148 |
| + | 119 (59.5%) | 63 (67.0%) | 56 (52.8%) |  |
| ++ | 58 (29.0%) | 20 (21.3%) | 38 (25.8%) |  |
| **Treatment** |  |  |  |  |
| ARB/ACEI, n (%) | 154 (77.0%) | 75 (79.8%) | 79 (74.5%) | 0.378 |
| Tacrolimus, n (%) | 150 (75.0%) | 71 (75.5%) | 79 (74.5%) | 0.870 |
| Glucocorticoids, n (%) | 60 (30.0%) | 28 (29.8%) | 32 (30.2%) | 0.951 |
| Cyclosporine A, n (%) | 17 (8.5%) | 11 (11.7%) | 6 (5.7%) | 0.126 |
| Cyclophosphamide, n (%) | 9 (4.5%) | 6 (6.4%) | 3 (2.8%) | 0.226 |
| Rituximab, n (%) | 20 (10.0%) | 5 (5.3%) | 15 (14.2%) | 0.038 |
| **Clinical Risks Stratification** |  |  |  | 0.536 |
| Moderate risk | 89 (44.5%) | 44 (46.8%) | 45 (42.5%) |  |
| High risk | 111 (55.5%) | 50 (53.2%) | 61 (57.5%) |  |
| **Clinical Outcomes** |  |  |  |  |
| Remission status |  |  |  | 0.025 |
| Partial remission, n (%) | 96 (48.0%) | 53 (56.4%) | 43 (40.6%) |  |
| Complete remission, n (%) | 104 (52.0%) | 41 (43.6%) | 63 (59.4%) |  |
| Immunological remission, n (%) | 150 (75.0%) | 61 (64.9%) | 89 (84.0%) | 0.002 |
| Time to remission (months) | 4.3 (2.0, 8.8) | 4.0 (2.0, 8.0) | 5.0 (3.0, 9.3) | 0.296 |
| Follow-up time (months) | 30.0 (22.3, 39.8) | 36.0 (24.8, 64.3) | 24.0 (17.8, 31.3) | <0.001 |
| Kidney progression, n (%) | 16 (8.0%) | 14 (14.9%) | 2 (1.9%) | <0.001 |

**Notes:** TyG=Ln [TG ( mg/dL)× FBG ( mg/dL) / 2], TyG-BMI=TyG × BMI (kg/m²), SII=PLT (109/L)× NEU (109/L)/ LYM (109/L);

**Abbreviations:** ACEI, angiotensin-converting enzyme inhibitor; ARB, angiotensin II receptor blocker; BMI, body mass index; CRP, C-reactive protein; eGFR, estimated glomerular filtration rate; GRS, genetic risk score; HDL, high-density lipoprotein; IgG, immunoglobulin G; IL-6, interleukin-6; IQR, interquartile range; LDL, low-density lipoprotein; PLA2R, phospholipase A2 receptor; SII, systemic immune-inflammation index; TyG, triglyceride-glucose; WBC, white blood cell.

## Table S2. Treatment-related adverse events during follow-up

| **Adverse Events** | **Total (N=234)** | **Remission (N=200)** | **Non-remission (N=34)** | **P** |
| --- | --- | --- | --- | --- |
| **Any adverse event, n (%)** | 45 (19.2%) | 35 (17.5%) | 10 (29.4%) | 0.567 |
| Upper respiratory tract infection, n (%) | 9 (3.8%) | 7 (3.5%) | 2 (5.9%) |  |
| Pulmonary infection, n (%) | 31 (13.2%) | 24 (12.0%) | 7 (20.6%) |  |
| Urinary tract infection, n (%) | 0 (0.0%) | 0 (0.0%) | 0 (0.0%) |  |
| Hyperglycemia, n (%) | 3 (1.3%) | 2 (1.0%) | 1 (2.9%) |  |
| Others, n (%) | 2 (0.9%) | 2 (1.0%) | 0 (0.0%) |  |

**Table S3. Cox Regression Analysis of Risk Factors for Remission**

| **Variable** | **Univariable Analysis** | | | **Multivariable Analysis** | | |
| --- | --- | --- | --- | --- | --- | --- |
| **HR** | **95% CI** | **P value** | **HR** | **95% CI** | **P value** |
| Age (years) | 0.989 | 0.979–0.999 | 0.036 | 0.984 | 0.971–0.998 | 0.027 |
| GRS | 0.973 | 0.831–1.139 | 0.732 | – | – | – |
| Total protein (g/L) | 1.027 | 1.009–1.046 | 0.004 | – | – | – |
| Albumin (g/L) | 1.053 | 1.022–1.086 | <0.001 | – | – | – |
| Cholesterol (mmol/L) | 0.933 | 0.871–1.000 | 0.049 | – | – | – |
| Triglyceridesl (mmol/L) | 0.899 | 0.828–0.977 | 0.012 | – | – | – |
| HDL cholesterol (mmol/L) | 1.298 | 1.020–1.653 | 0.034 | – | – | – |
| eGFR (ml/min/1.73m²) | 1.006 | 1.000–1.012 | 0.049 | – | – | – |
| 24-hour proteinuria (g/24h) | 0.938 | 0.887–0.991 | 0.023 | 0.908 | 0.843–0.978 | 0.011 |
| Urinary sodium (mmol/24h) | 0.998 | 0.996–1.000 | 0.046 | – | – | – |
| Anti-PLA2R antibody (RU/ml) | 0.998 | 0.997–0.999 | <0.001 | 0.998 | 0.997–1.000 | 0.010 |
| TyG index | 0.639 | 0.504–0.811 | <0.001 | – | – | – |
| TyG-BMI index | 0.997 | 0.995–1.000 | 0.041 | – | – | – |
| Diabetes | 0.481 | 0.315–0.733 | <0.001 | – | – | – |

**Abbreviations:** GRS, genetic risk score; HR, hazard ratio; CI, confidence interval; HDL, high-density lipoprotein; eGFR, estimated glomerular filtration rate; TyG, triglyceride-glucose index; TyG-BMI, triglyceride-glucose-body mass index.

**Table S4. Cox regression** **analysis of risk factors for relapse**

| **Variable** | **Univariable analysis** | | | **Multivariable analysis** | | |
| --- | --- | --- | --- | --- | --- | --- |
| **HR** | **95% CI** | **P value** | **HR** | **95% CI** | **P value** |
| GRS | 1.800 | 1.277–2.535 | <0.001 | 1.639 | 1.173–2.291 | 0.004 |
| Albumin (g/L) | 1.042 | 0.996–1.090 | 0.074 | – | – | – |
| Uric acid (μmol/L) | 1.002 | 1.000–1.004 | 0.039 | 1.002 | 1.000–1.005 | 0.030 |
| Glomerulosclerosis (%) | 1.016 | 0.999–1.033 | 0.060 | – | – | – |
| Cyclosporine A | 2.126 | 1.116–4.051 | 0.022 | 2.408 | 1.228–4.728 | 0.011 |
| Time to remission (months) | 0.971 | 0.942–1.000 | 0.049 | 0.940 | 0.909–0.972 | <0.001 |
| Immunological remission | 0.665 | 0.431–1.027 | 0.066 | – | – | – |
| Remission status (PR vs CR ) | 2.005 | 1.327–3.029 | <0.001 | 3.322 | 3.014–5.161 | <0.001 |

**Abbreviations:** GRS, genetic risk score; HR, hazard ratio; CI, confidence interval; CR, complete remission; PR, partial remission.

**Table S5. Improvement in relapse risk prediction by adding GRS to the base model**

| **Items** | **AUC (95%CI)** | **P for AUC** | **NRI (95% CI)** | **P for NRI** | **IDI (95% CI)** | **P for IDI** | **AIC** | **BIC** | **LRT** |
| --- | --- | --- | --- | --- | --- | --- | --- | --- | --- |
| **1 year** |  | <0.001 |  | 0.003 |  | 0.004 |  |  | 0.077 |
| Base model | 0.811 (0.719-0.902) |  | reference |  | reference |  | 226.59 | 234.53 |  |
| Base model + GRS | 0.825 (0.726-0.924) |  | 0.398 (0.131-0.664) |  | 0.033 (0.005-0.135) |  | 225.45 | 234.54 |  |
| **2 year** |  | <0.001 |  | <0.001 |  | 0.002 |  |  | <0.001 |
| Base model | 0.741 (0.653-0.830) |  | reference |  | reference |  | 577.84 | 592.50 |  |
| Base model + GRS | 0.778 (0.698-0.859) |  | 0.467 (0.248-0.685) |  | 0.076 (0.017-0.161) |  | 563.51 | 580.27 |  |
| **4 year** |  | <0.001 |  | <0.001 |  | <0.001 |  |  | <0.001 |
| Base model | 0.842 (0.724-0.961) |  | reference |  | reference |  | 789.46 | 806.96 |  |
| Base model + GRS | 0.869 (0.759-0.979) |  | 0.422 (0.199-0.646) |  | 0.066 (-0.005-0.141) |  | 776.60 | 796.60 |  |
| **5 year** |  | <0.001 |  | <0.001 |  | <0.001 |  |  | <0.001 |
| Base model | 0.755 (0.591-0.919) |  | reference |  | reference |  | 793.82 | 811.40 |  |
| Base model + GRS | 0.850 (0.691-0.999) |  | 0.412 (0.190-0.635) |  | 0.063 (-0.012-0.136) |  | 780.21 | 800.30 |  |

**Notes:** Base model: time-dependent ROC model based on a multivariable Cox regression analysis including the variables: Remission status, Immunological remission, Glomerulosclerosis, UA, CsA use, ALB, and time to remission. P for AUC: Time-dependent AUC bootstrap test for difference between models.

**Abbreviations**: AUC, area under the curve; CI, confidence interval; NRI, net reclassification improvement; IDI, integrated discrimination improvement; AIC, Akaike information criterion; BIC, Bayesian information criterion; LRT, likelihood ratio test; GRS, genetic risk score; UA, uric acid; CsA, cyclosporine A; ALB, albumin.

**Figure S1**.Comparison of maintenance therapy duration between patients with and without adverse reactions.

**
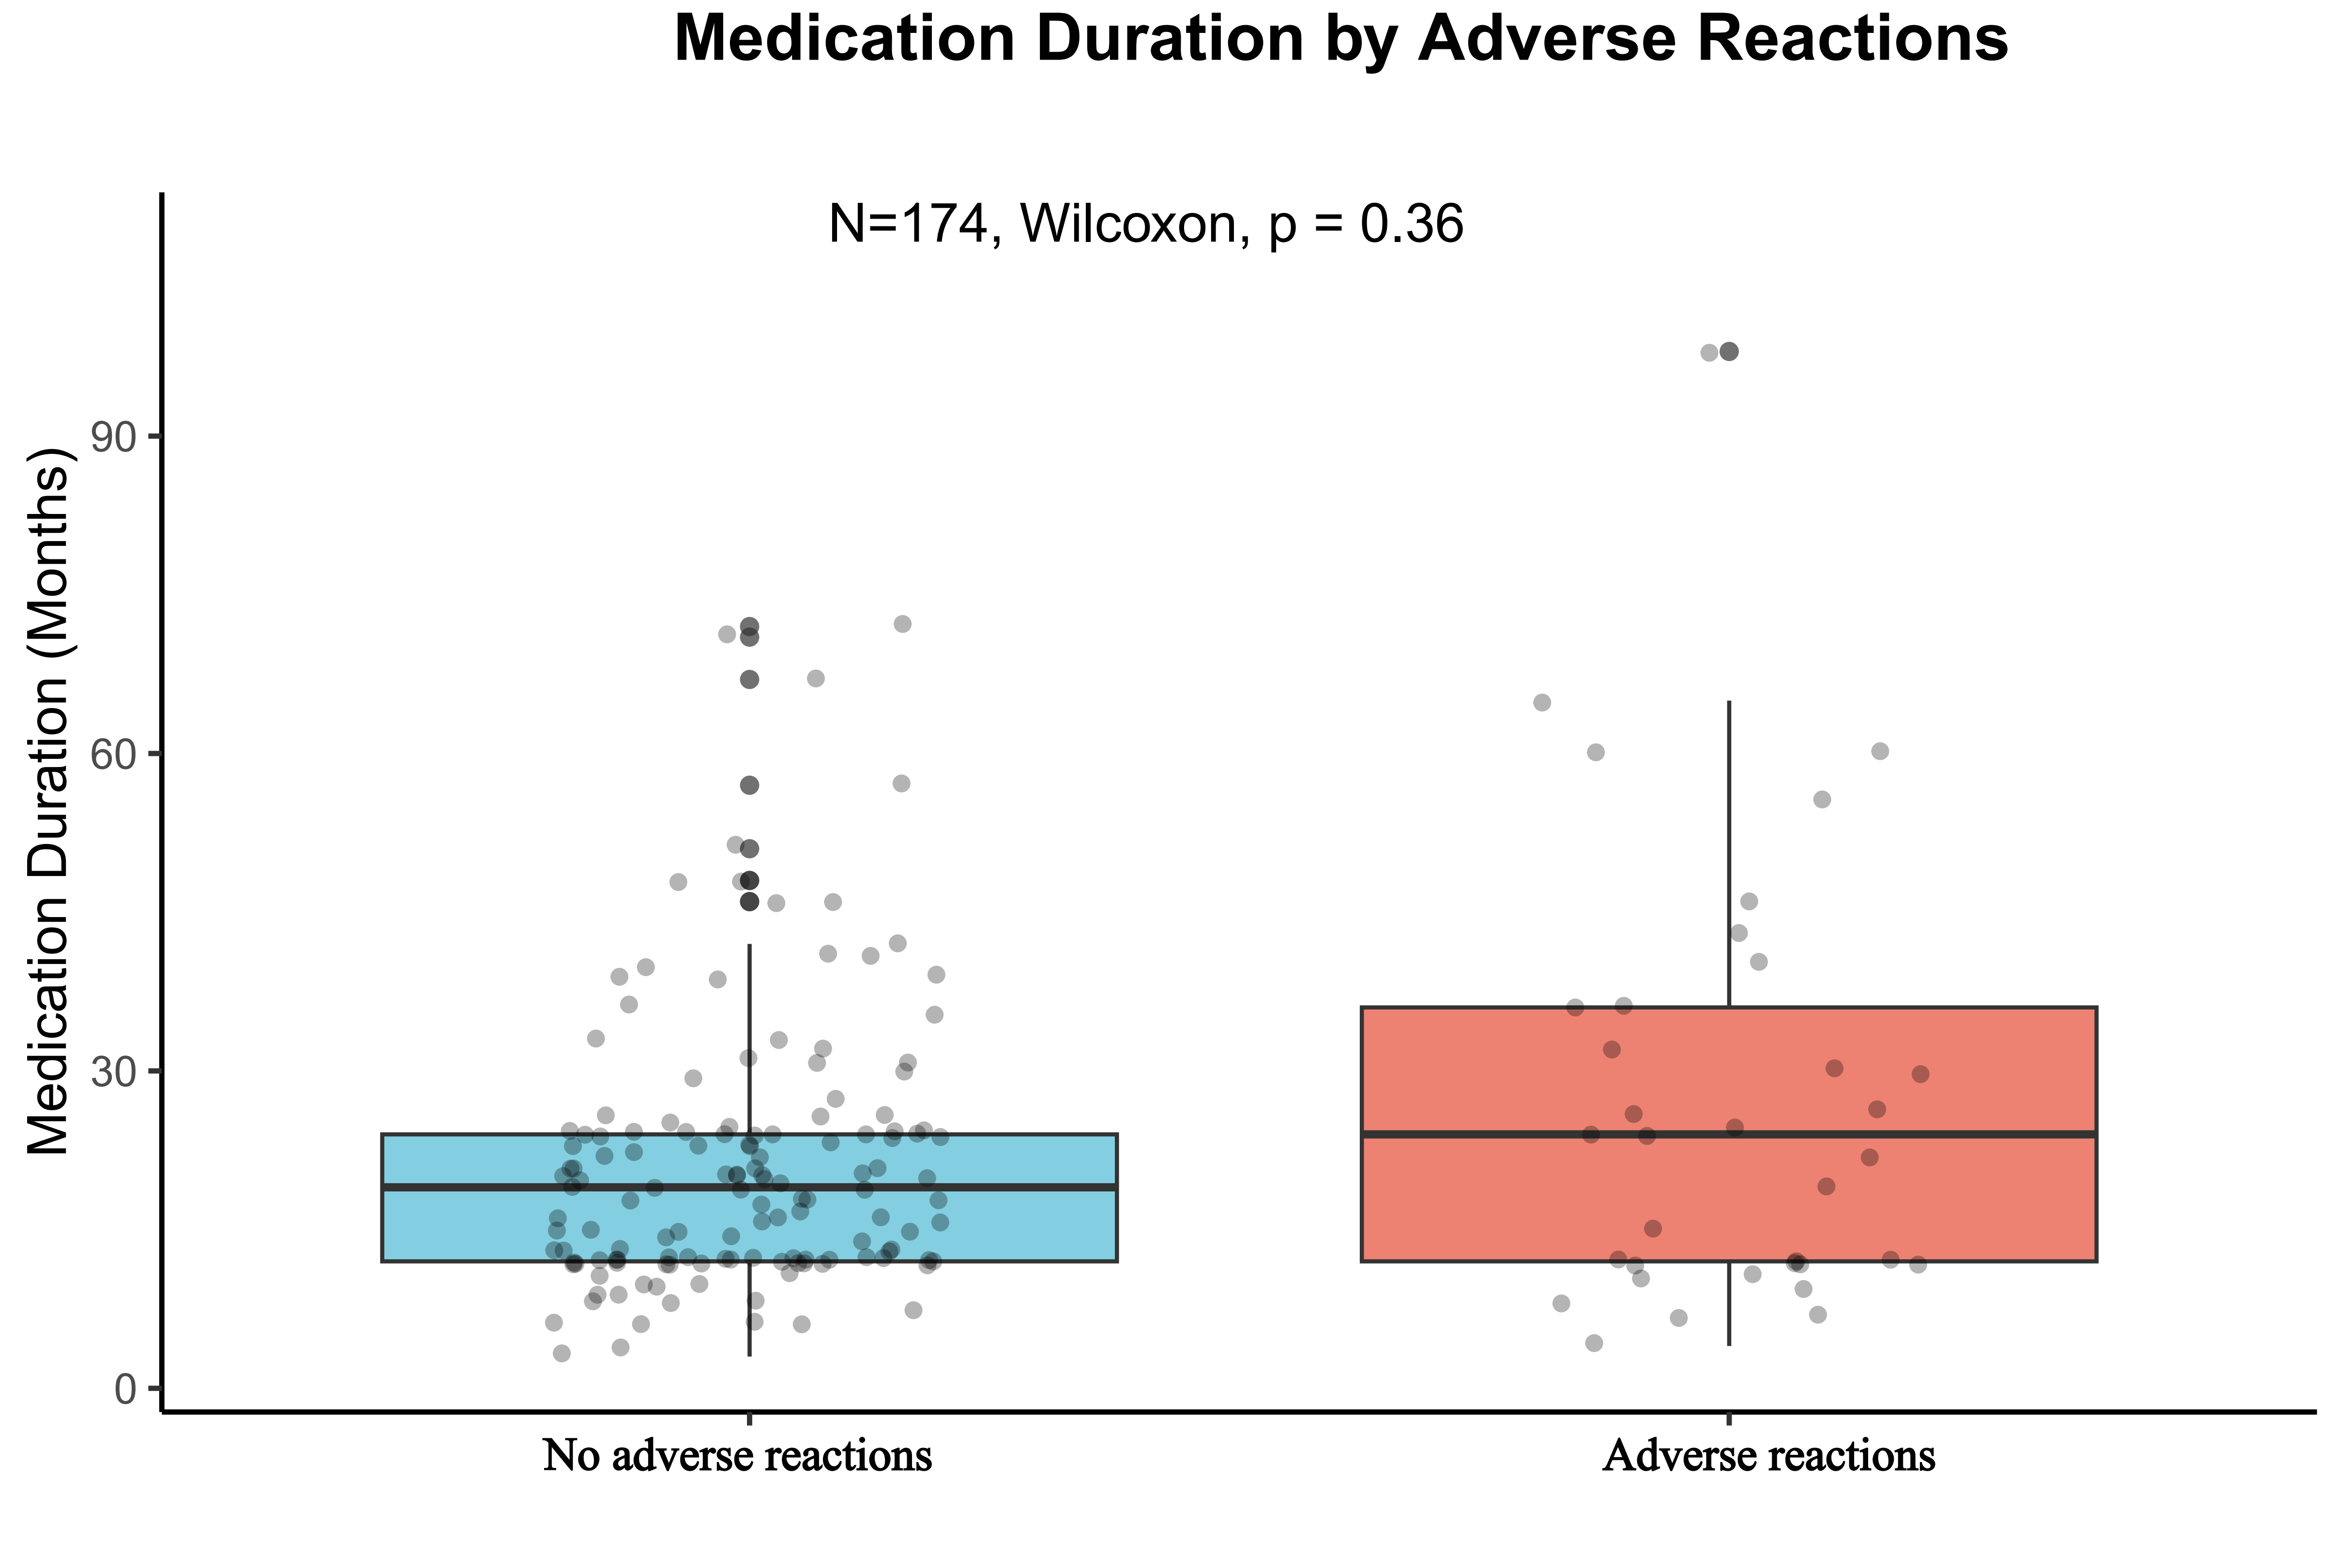
**

**Figure S2.** Impact of high-risk vs. low-risk GRS groups on renal outcomes


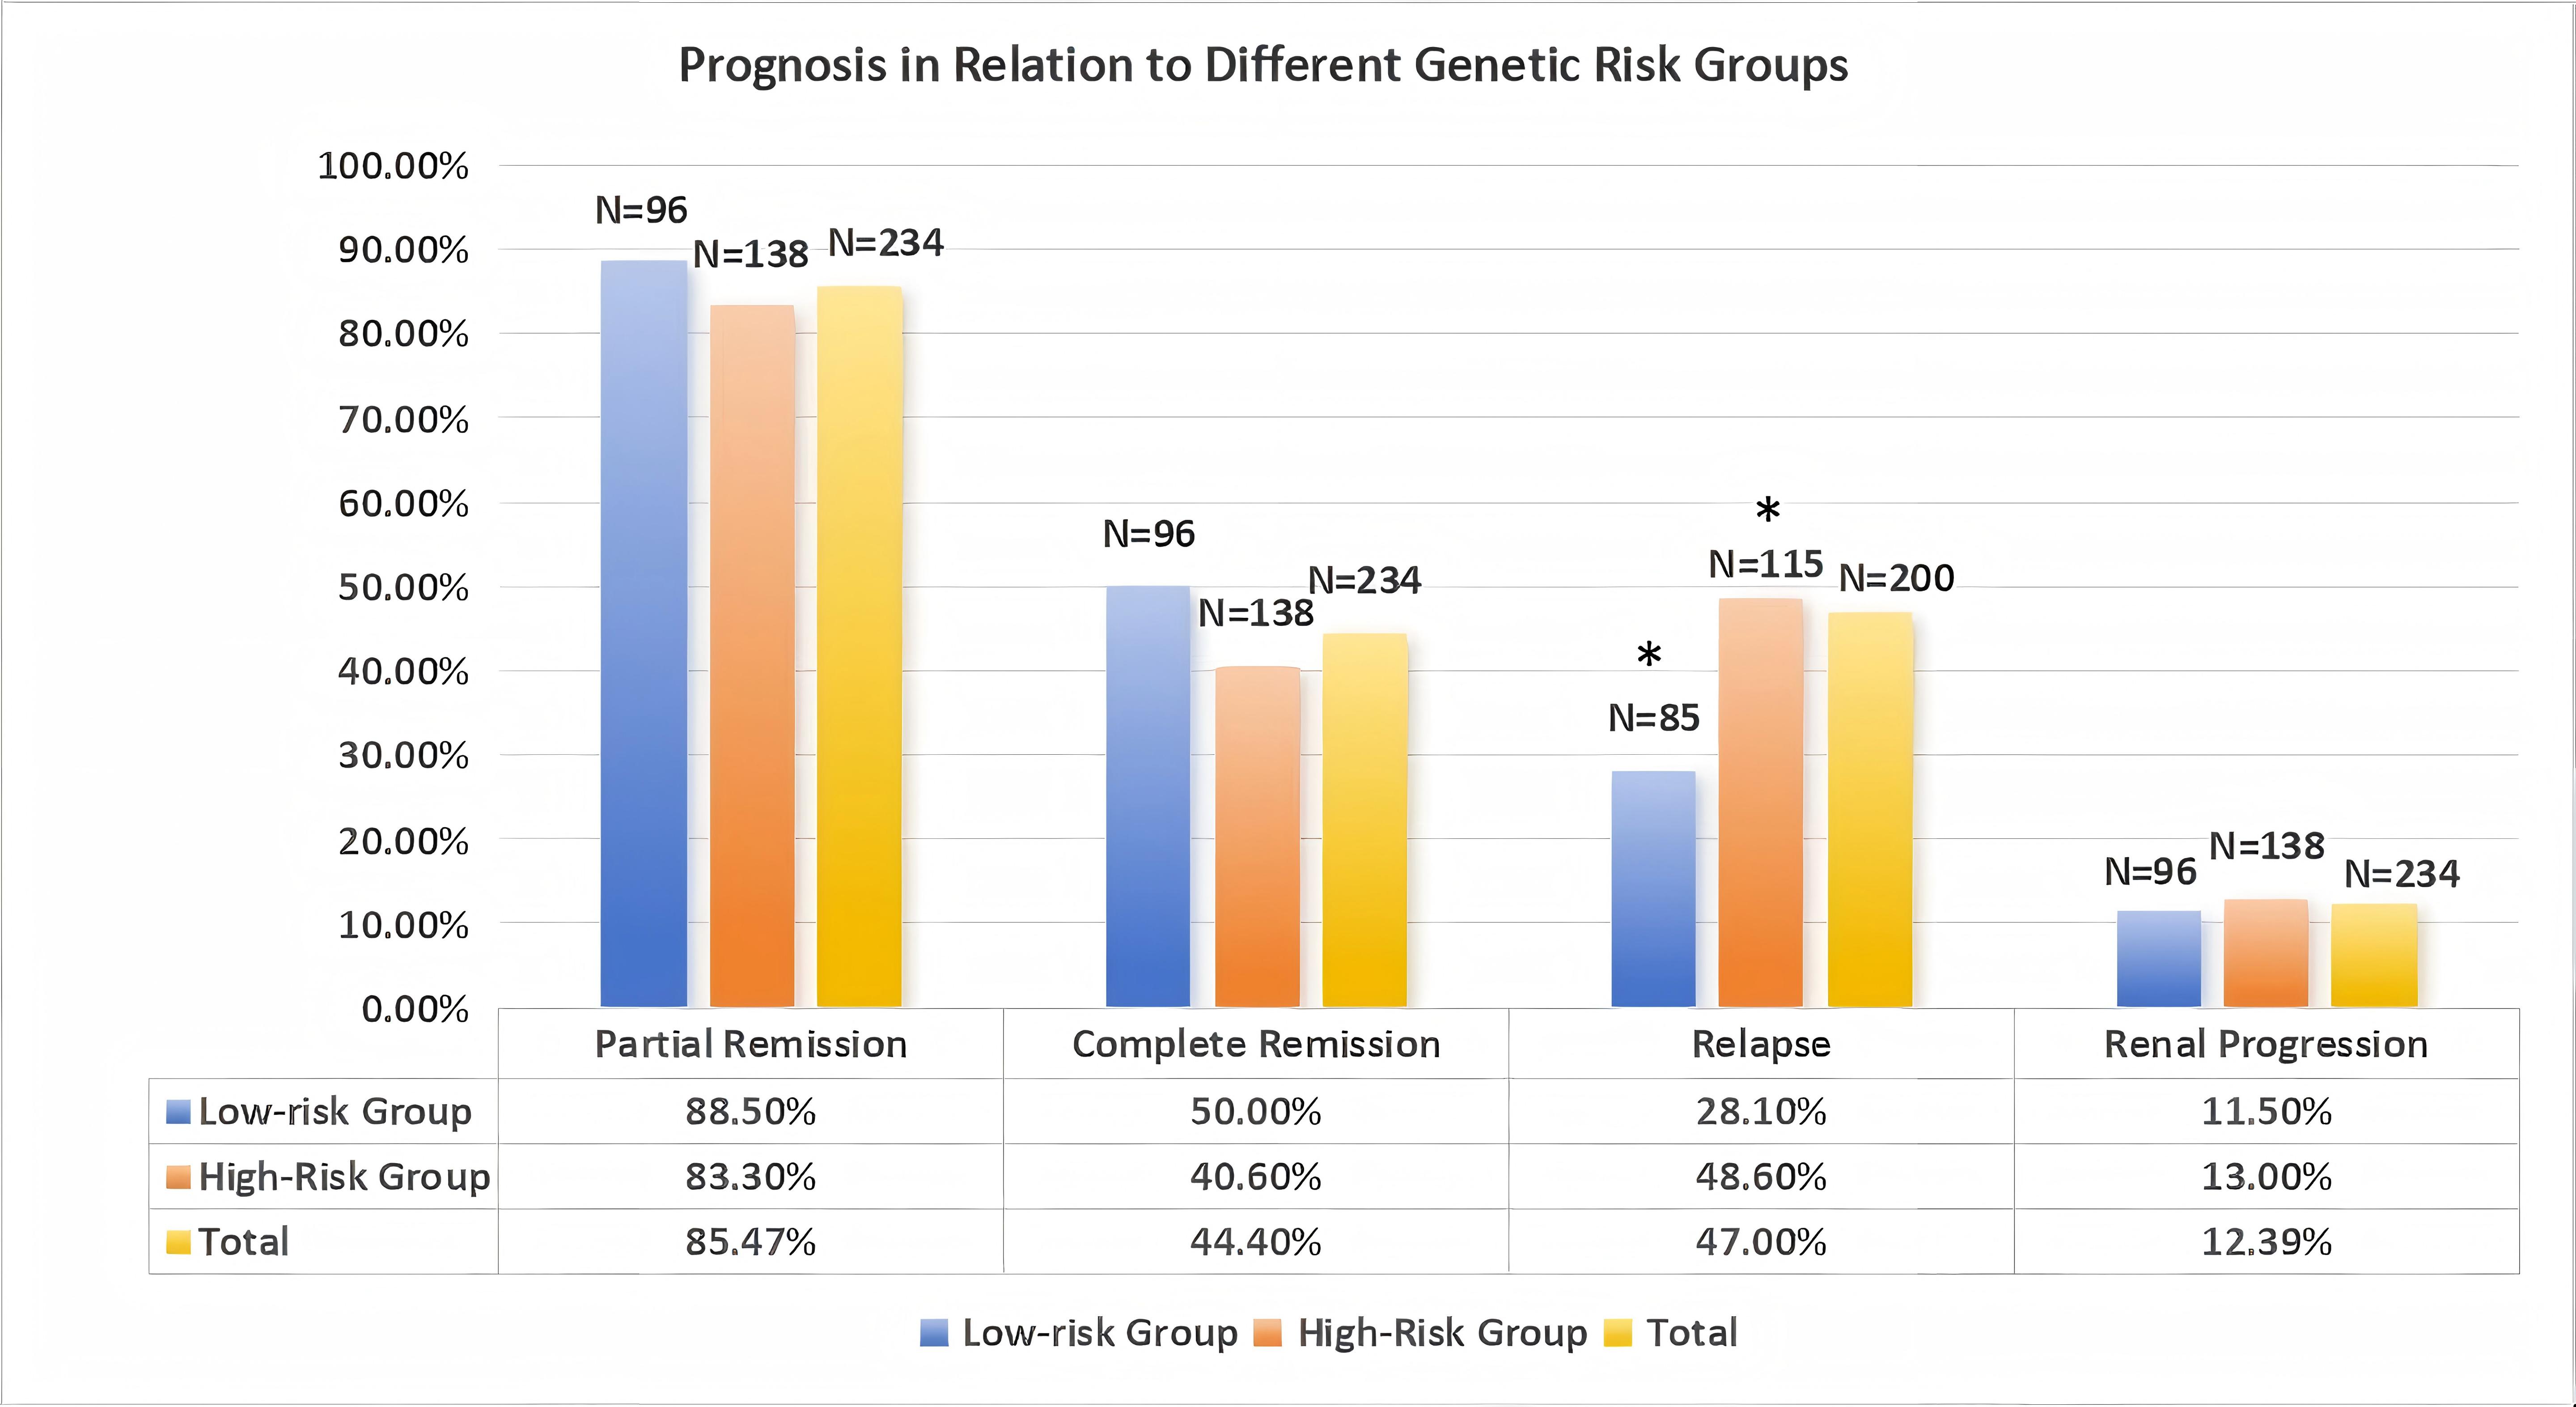


Abbreviations: GRS: genetic risk score

**Figure S3.** Box plots of C-index distributions from 10-fold cross-validation comparing the base model (left, red) versus the combined model (base model + GRS; right, blue)


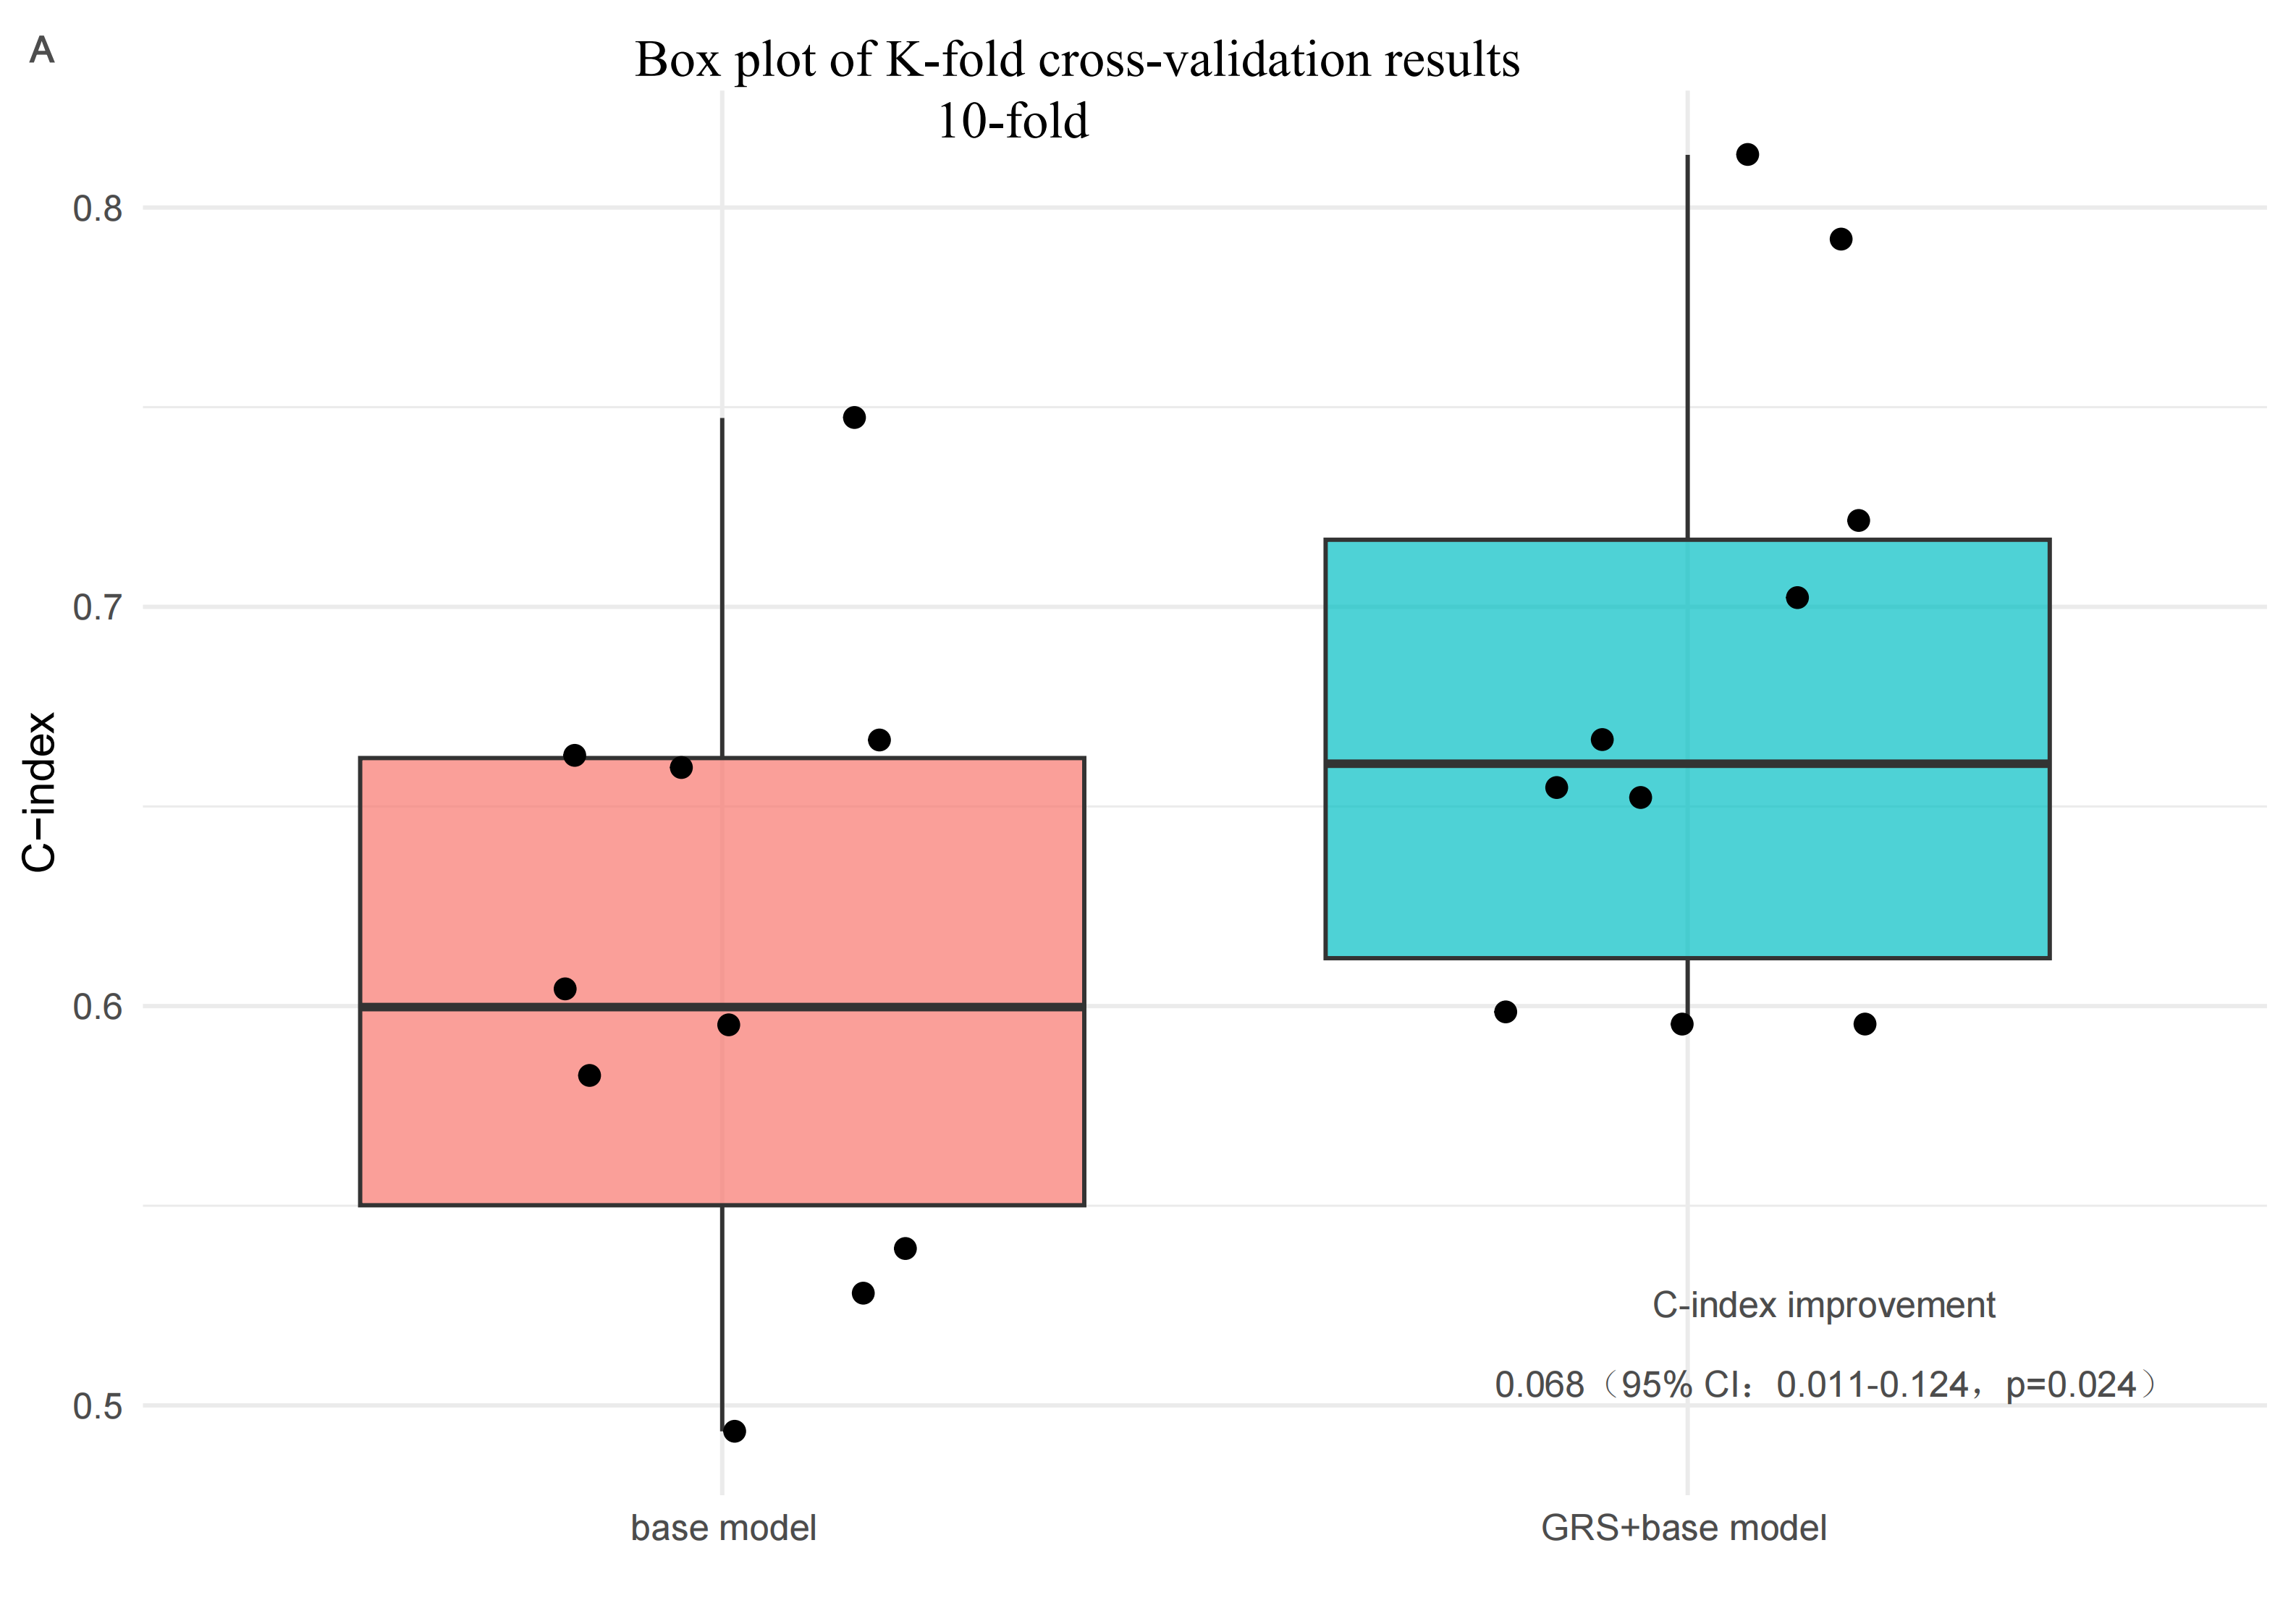


**Figure S4.**Scatter plot demonstrating consistent performance improvement of the combined model (integrating GRS) over the base model


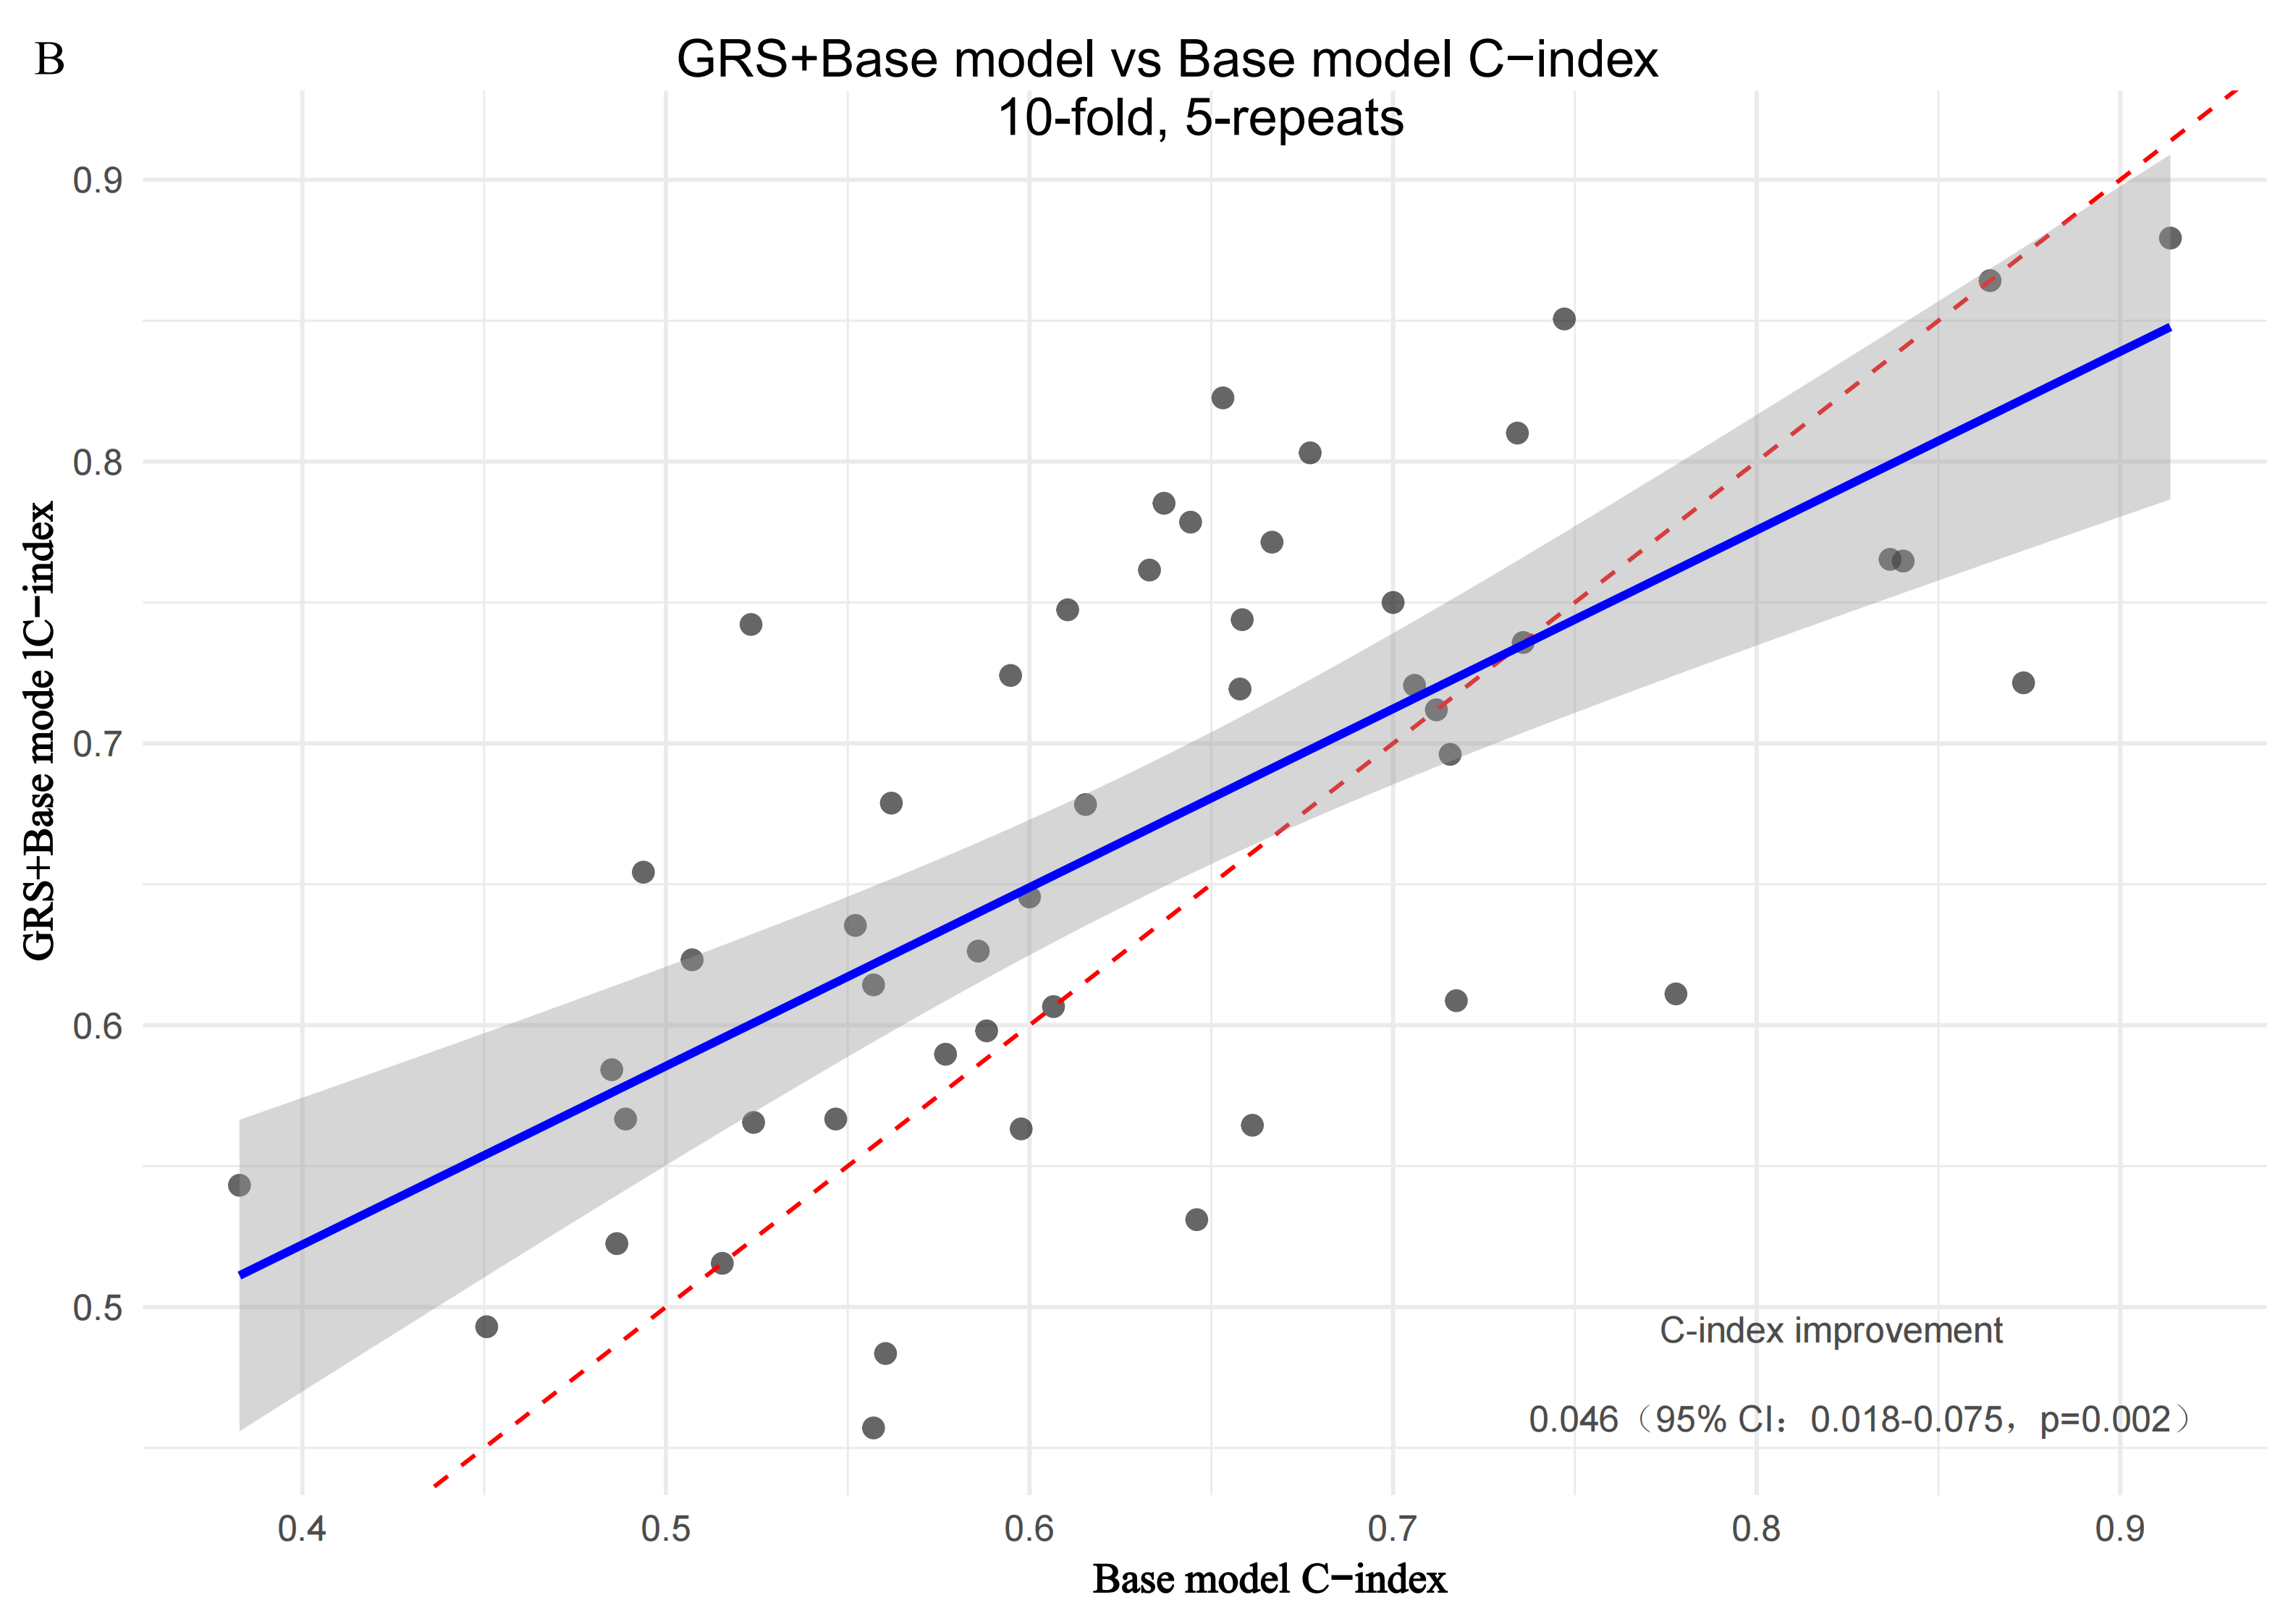


Each black dot represents an independent cross-validation run (n=50 from 5×10-fold CV). The red line is the reference line (y=x), and the blue solid line is the linear regression trend line for all data points, representing the average overall trend of the performance relationship between the two models.

**Figure S5.** Distribution of C-index improvement values across different follow-up time points (1, 2, 3, and 5 years) based on 10-repeated 10-fold cross-validation.





The Y-axis represents the difference in C-index between the joint model (incorporating GRS) and the base model, serving as the key metric for evaluating the contribution of GRS to predictive performance enhancement. The red horizontal dashed line (y=0) indicates the "no improvement" reference line, representing identical performance between the two models. Each colored dot in the plot represents an independent validation result. The black diamond markers denote the mean C-index improvement values across all validation results for each year, with the upper and lower black error bars indicating the standard error (SE), reflecting the precision of the mean estimate.

**Figure S6.** Time-dependent ROC curve based on the Cox proportional hazards regression model at (A) the first year; (B) the second year; (C) the fourth year; (D) the fifth year


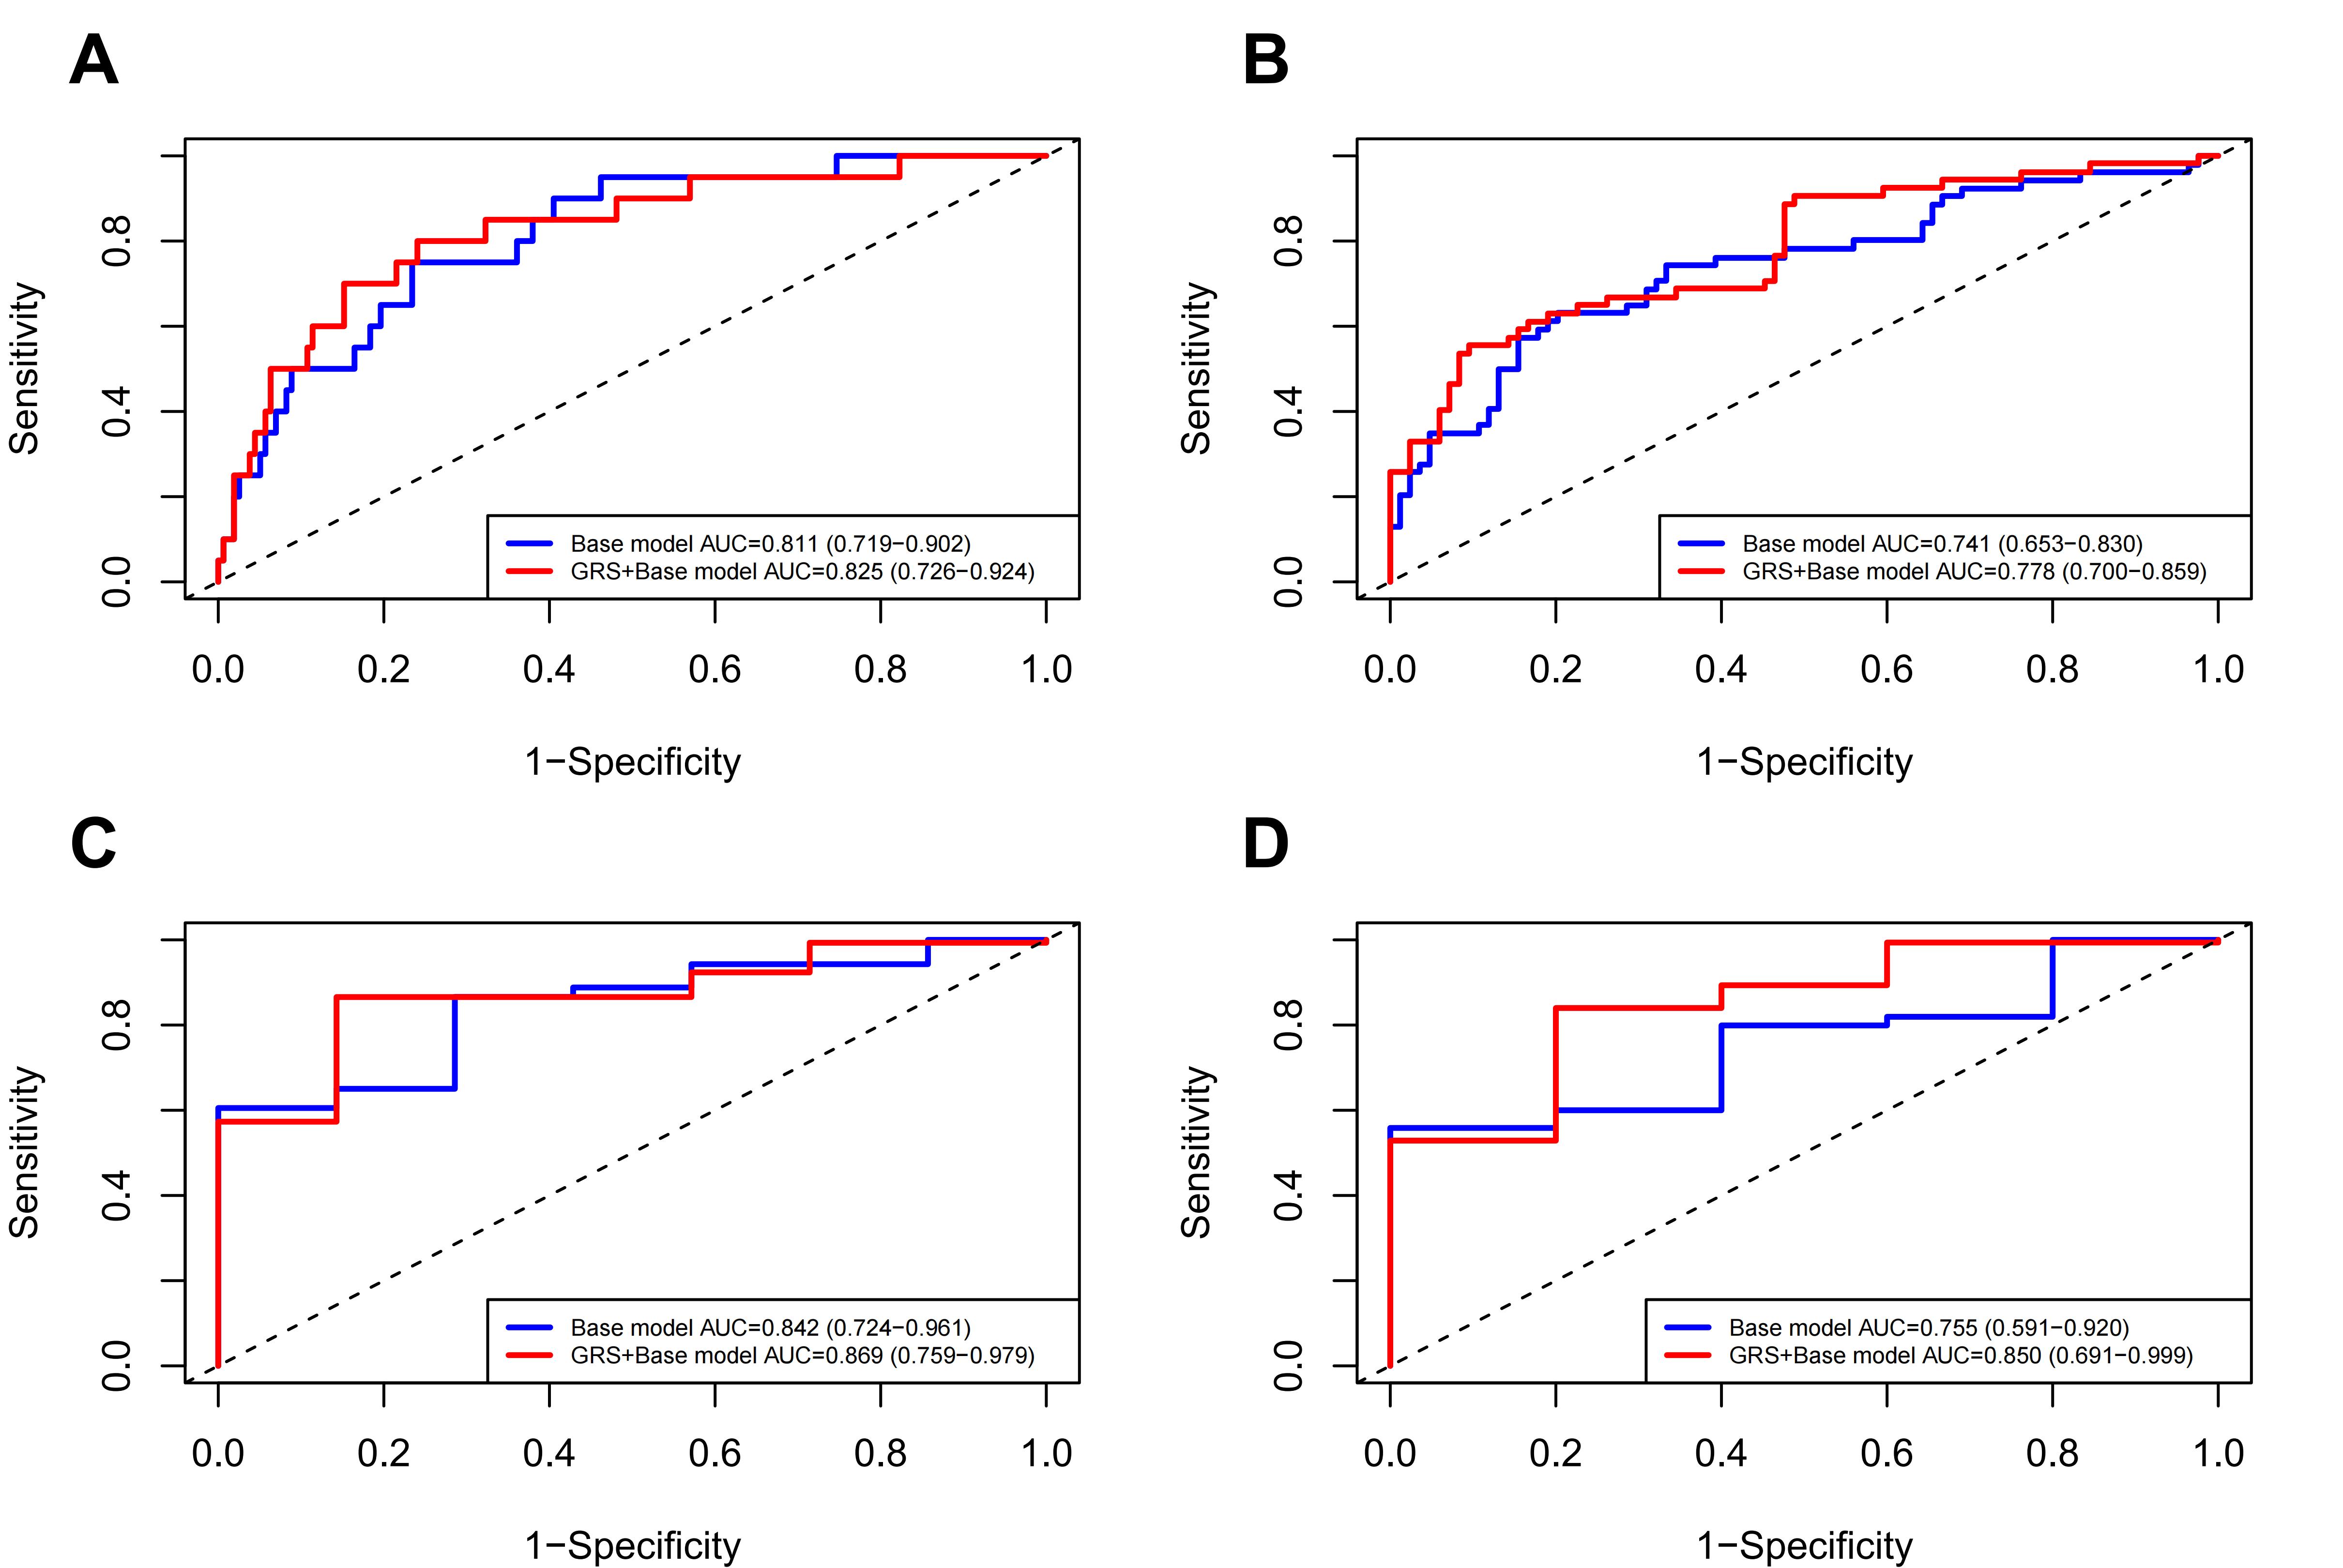


**Notes:** Base model: time-dependent ROC model based on a multivariable Cox regression analysis including the variables: Remission status, Immunological remission, Glomerulosclerosis, UA, CsA use, ALB, and time to remission. P for AUC: Time-dependent AUC bootstrap test for difference between models.

**Abbreviations:** AUC, area under the curve; GRS, genetic risk score; UA, uric acid; CsA, cyclosporine A; ALB, albumin.
